# Supplementary material for: A dual organelle-targeting photosensitizer based on curcumin for enhanced photodynamic therapy
Source: Royal Society of Chemistry journal article supplement (doi:10.1039/d3tb01648j), 2023-01-01
Supplement: d3tb01648j1.pdf [file d3tb01648j1.pdf]

## Supporting Information

### A dual organelle-targeting photosensitizer based on curcumin for enhanced photodynamic therapy

Yanping Wang,<sup>†,a,b</sup> Xuewei Li,<sup>†,a,b</sup> Weimin Liu,<sup>\*,a,b,c</sup> Jie Sha,<sup>a,b</sup> Zhe Yu,<sup>a,b</sup> Shuai Wang,<sup>a,b</sup> Haohui Ren,<sup>a,c</sup> Wenjun Zhang,<sup>d</sup> Chun-Sing Lee,<sup>d</sup> and Pengfei Wang<sup>\*,a,b</sup>

<sup>a</sup>Key Laboratory of Photochemical Conversion and Optoelectronic Materials & CityU-CAS Joint Laboratory of Functional Materials and Devices, Technical Institute of Physics and Chemistry, Chinese Academy of Sciences, Beijing 100190, P. R. China.

<sup>b</sup>School of Future Technology, University of Chinese Academy of Sciences, Beijing, 100049, P. R. China.

<sup>c</sup>Qingdao Casfuture Research Institute CO., LTD, P. R. China.

<sup>d</sup>Department of Materials Science and Engineering & Center of Super-Diamond and Advanced Films, City University of Hong Kong, Hong Kong, P. R. China.

\* E-mail: [wmliu@mail.ipc.ac.cn](mailto:wmliu@mail.ipc.ac.cn); [wangpf@mail.ipc.ac.cn](mailto:wangpf@mail.ipc.ac.cn)

<sup>†</sup> These authors contributed equally.

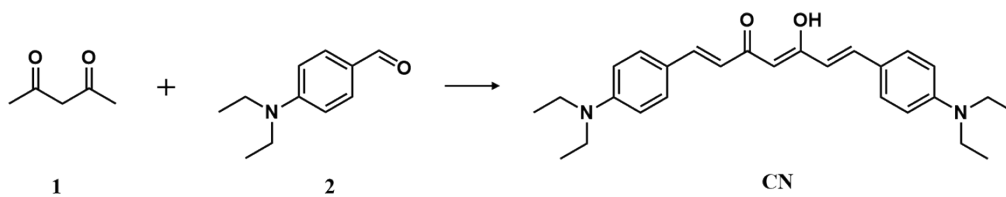

**Fig. S1.** Synthetic routes to CN.

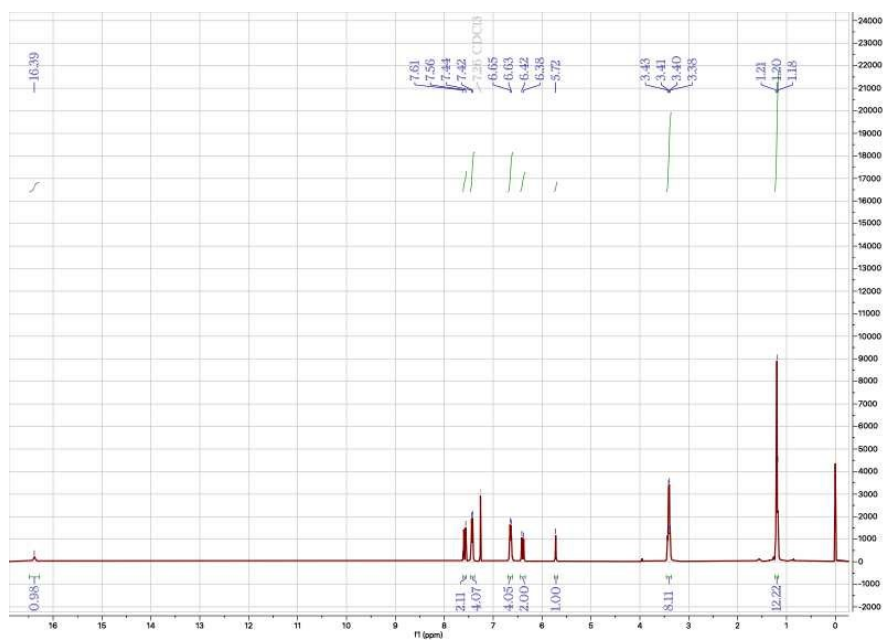

**Fig. S2.** <sup>1</sup>H NMR (400 MHz, CDCl<sub>3</sub>) spectrum of CN.

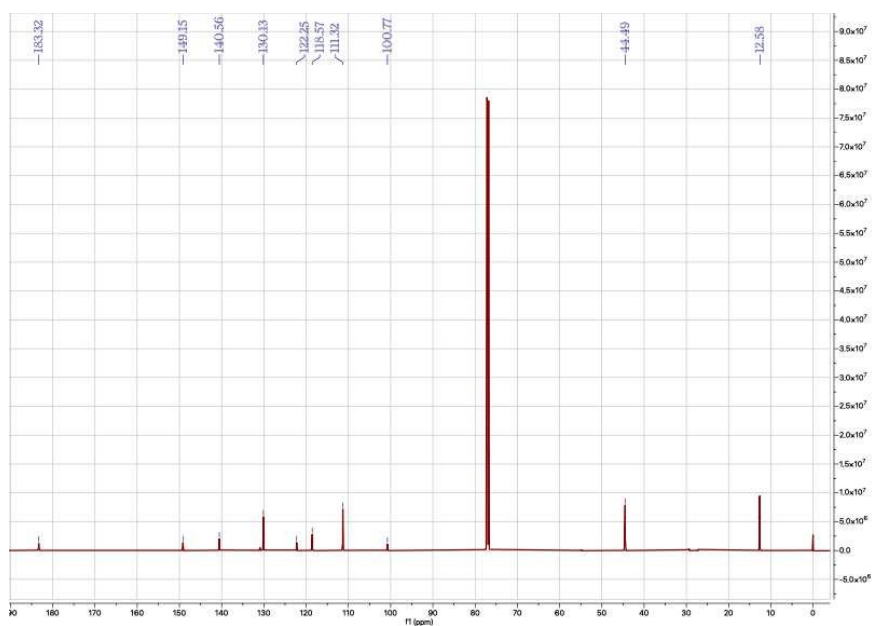

**Fig. S3.** <sup>13</sup>C NMR (151 MHz, CDCl<sub>3</sub>) spectrum of CN.

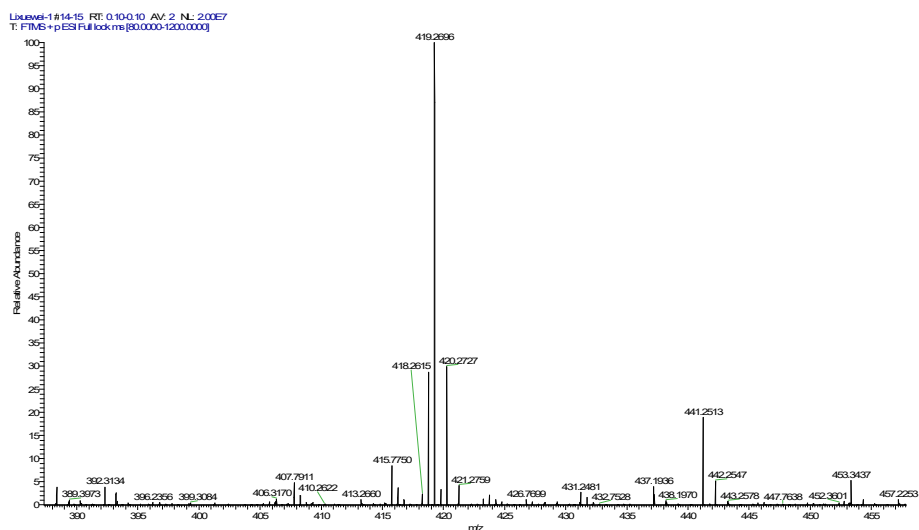

**Fig. S4.** High resolution mass spectrum of CN.

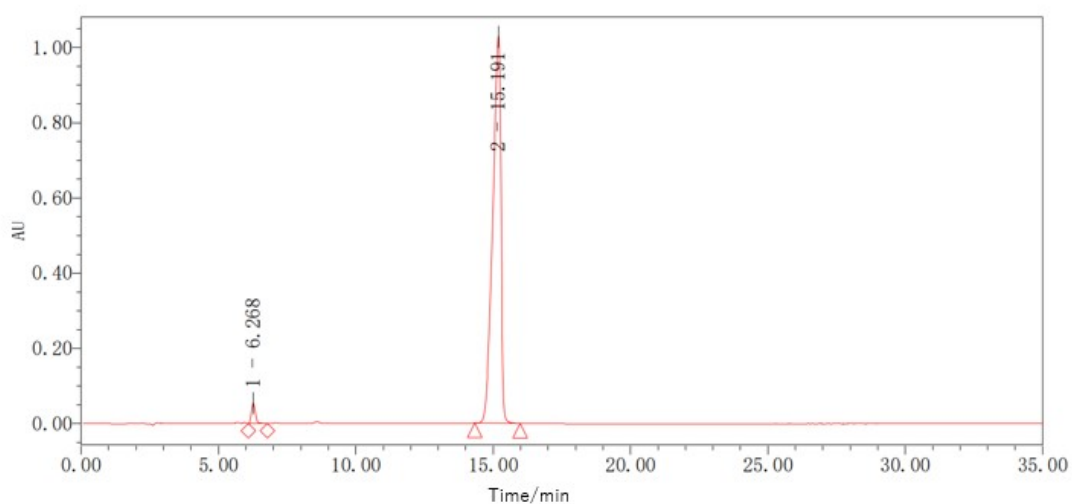

**Fig. S5.** HPLC chromatogram of CN.

**Table S1.** The photophysical properties of CN.

| Solvent | ET (30)<br>(kcal/mol) | $\lambda_{\text{abs}}^{\text{a}}$<br>(nm) | $\lambda_{\text{em}}^{\text{b}}$<br>(nm) | stoke shift<br>(nm) | $\epsilon$<br>$\text{M}^{-1}\text{cm}^{-1}$ | $\Phi_{\text{F}}^{\text{c}}$<br>(%) |
|---------|-----------------------|-------------------------------------------|------------------------------------------|---------------------|---------------------------------------------|-------------------------------------|
| Toluene | 33.9                  | 469                                       | 527                                      | 58                  | $5.8 \times 10^4$                           | 36.3                                |
| THF     | 37.4                  | 477                                       | 550                                      | 73                  | $7.2 \times 10^4$                           | 50.2                                |
| DCM     | 40.7                  | 498                                       | 580                                      | 82                  | $7.7 \times 10^4$                           | 64.3                                |
| DMF     | 43.2                  | 504                                       | 587                                      | 83                  | $7.8 \times 10^4$                           | 38.3                                |
| DMSO    | 45.1                  | 511                                       | 606                                      | 95                  | $9.6 \times 10^4$                           | 38.1                                |

a: absorption maximum. b: fluorescence maximum. c: Absolute fluorescence quantum yield determined using a calibrated integrating sphere. Concentration = 10  $\mu\text{M}$ . ET (30) of each solvent were collected from reference.

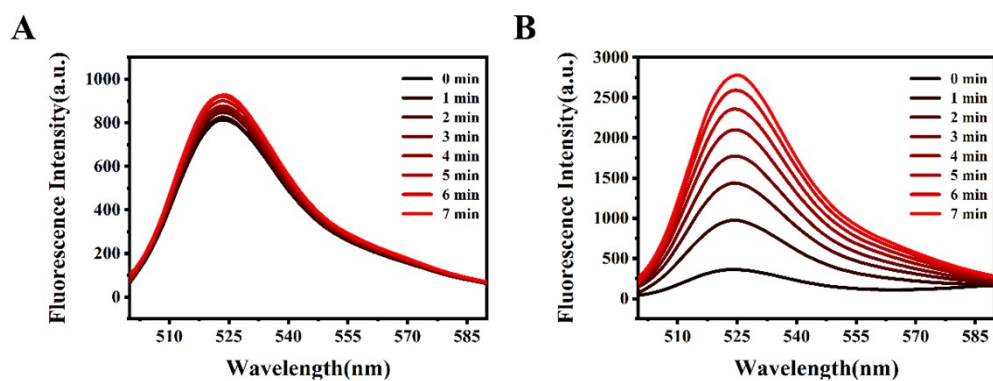

**Fig. S6.** PL spectra of DCFH-DA in the presence of (A) pure DCFH-DA and (B) CN+ DCFH-DA under 532 nm laser irradiation ( $10 \text{ mW cm}^{-2}$ ). Concentration =  $10 \mu\text{M}$ ;  $\lambda_{\text{ex}}$  = 488 nm.

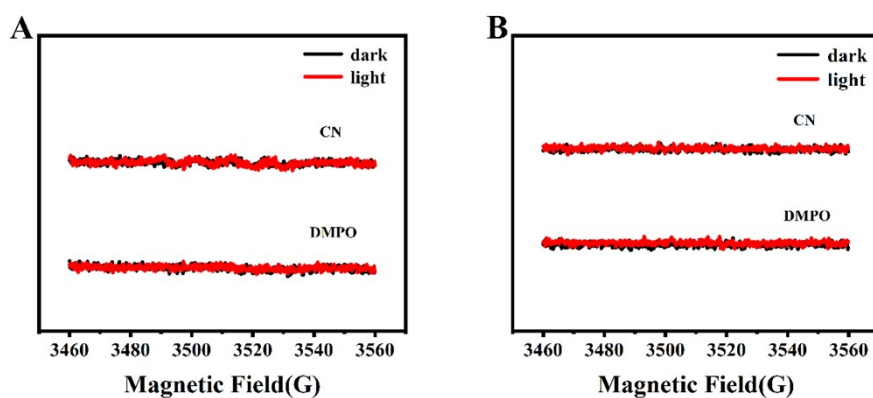

**Fig. S7.** (A)  $\text{O}_2^{\cdot-}$  and (B)  $\cdot\text{OH}$  generation of CN under 532nm laser irradiation ( $10 \text{ mW cm}^{-2}$ , 10 min).

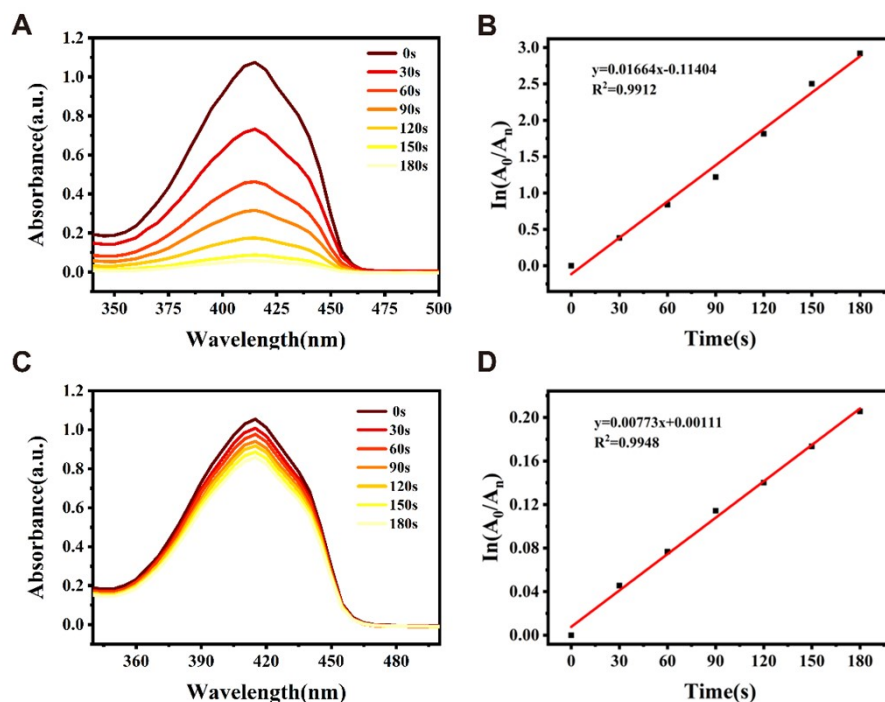

**Fig. S8.** UV-Vis spectra of DPBF (20  $\mu\text{M}$ ) in DMF solutions under 532nm laser irradiation ( $10 \text{ mW cm}^{-2}$ ) in the presence of (A) RB and (C) CN. The absorbance decay of the DPBF at 415 nm under 532 nm laser irradiation ( $10 \text{ mW cm}^{-2}$ ) in the presence of (B) RB and (D) CN.

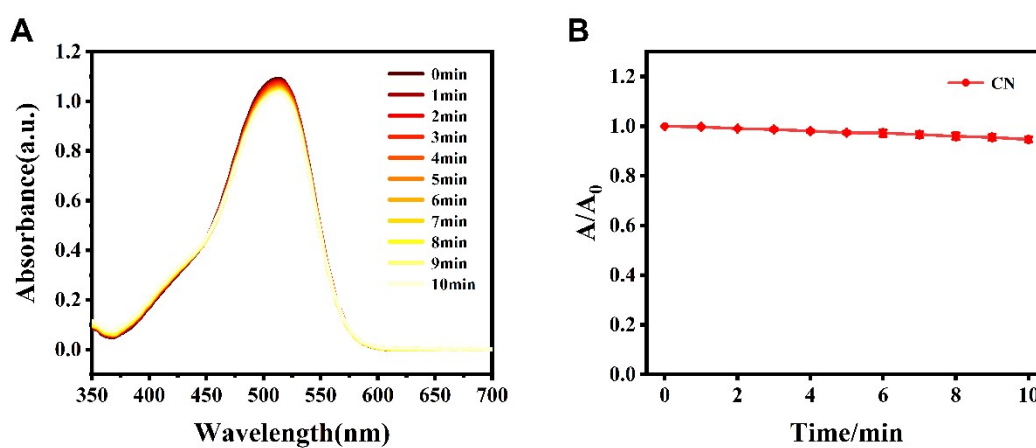

**Fig. S9.** (A) Absorption spectra and (B) Photostability ( $A/A_0$ ) of CN under laser irradiation (532 nm,  $0.1 \text{ W cm}^{-2}$ ).

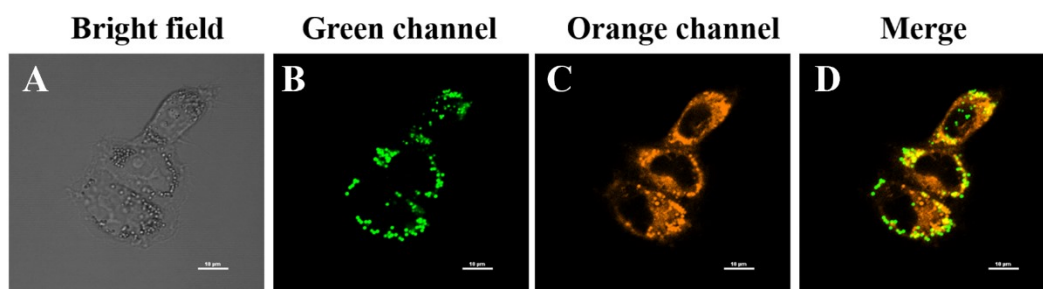

**Fig. S10.** Fluorescent images of HeLa cells stained with 1  $\mu\text{M}$  CN in (A) bright field, (B) green channel ( $\lambda_{\text{ex}} = 488 \text{ nm}$ ,  $\lambda_{\text{em}} = 500\text{-}550 \text{ nm}$ ), (C) orange channel ( $\lambda_{\text{ex}} = 561 \text{ nm}$ ,  $\lambda_{\text{em}} = 570\text{-}620 \text{ nm}$ ), and (D) merged image for image B and C. Scale bar = 10  $\mu\text{m}$ .

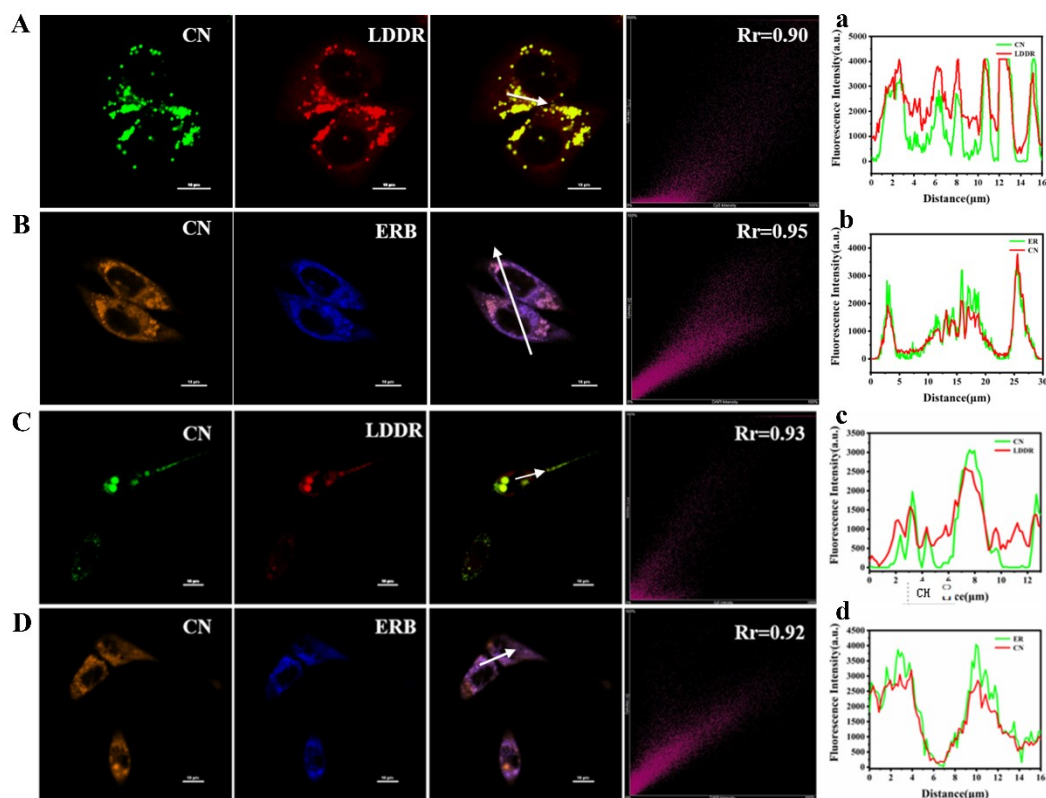

**Fig. S11.** Fluorescent images of (A, B) HepG-2 cells and (C, D) A549 cells stained with CN (1  $\mu\text{M}$ ) in green channel ( $\lambda_{\text{ex}} = 488 \text{ nm}$ ,  $\lambda_{\text{em}} = 500\text{-}550 \text{ nm}$ ), orange channel ( $\lambda_{\text{ex}} = 561 \text{ nm}$ ,  $\lambda_{\text{em}} = 570\text{-}620 \text{ nm}$ ), LDDR (0.2  $\mu\text{m}$ ) ( $\lambda_{\text{ex}} = 638 \text{ nm}$ ,  $\lambda_{\text{em}} = 663\text{-}738 \text{ nm}$ ) and ERB (0.5  $\mu\text{m}$ ) ( $\lambda_{\text{ex}} = 405 \text{ nm}$ ,  $\lambda_{\text{em}} = 425\text{-}475 \text{ nm}$ ); (a-d) The profile plot of two channels along the arrow in merge channel. Scale bar = 10  $\mu\text{m}$ .

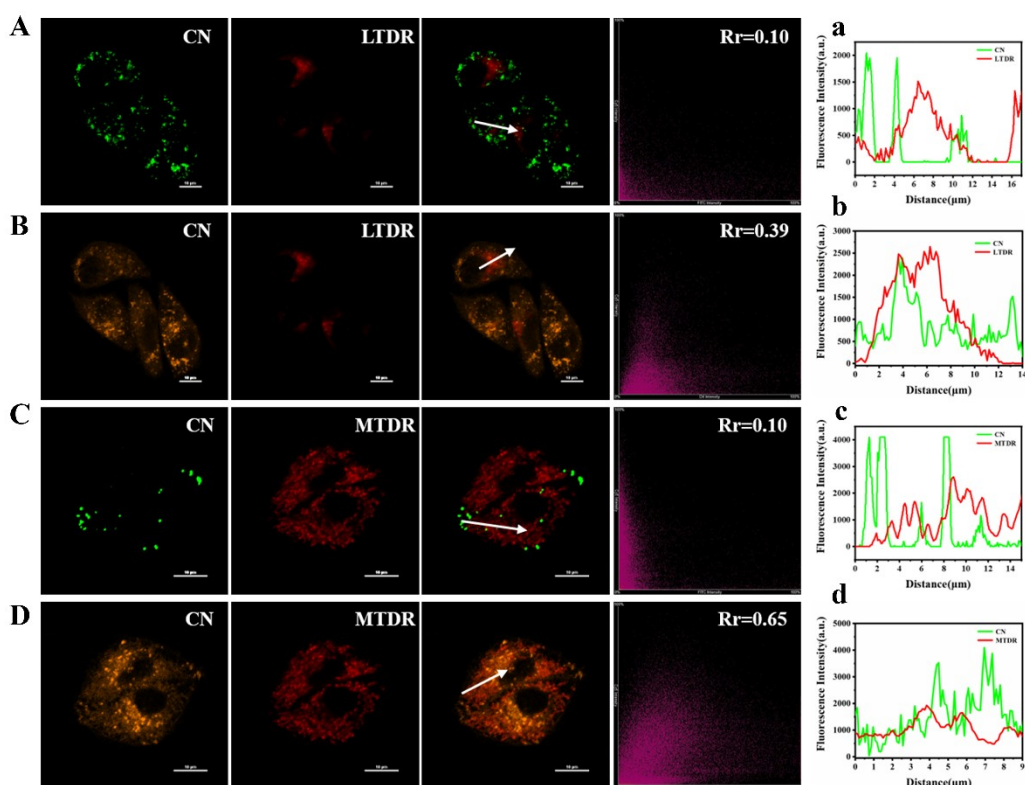

**Fig. S12.** Fluorescent images of HeLa cells stained with CN (1  $\mu\text{M}$ ) in green channel ( $\lambda_{\text{ex}} = 488 \text{ nm}$ ,  $\lambda_{\text{em}} = 500\text{-}550 \text{ nm}$ ), orange channel ( $\lambda_{\text{ex}} = 561 \text{ nm}$ ,  $\lambda_{\text{em}} = 570\text{-}620 \text{ nm}$ ), (A, B) LTDR (0.2  $\mu\text{m}$ ) ( $\lambda_{\text{ex}} = 638 \text{ nm}$ ,  $\lambda_{\text{em}} = 663\text{-}738 \text{ nm}$ ) and (C, D) MTDR (0.2  $\mu\text{m}$ ) ( $\lambda_{\text{ex}} = 638 \text{ nm}$ ,  $\lambda_{\text{em}} = 663\text{-}738 \text{ nm}$ ); (a-d) profile plot of two channels along the arrow in merge channel. Scale bar = 10  $\mu\text{m}$ .

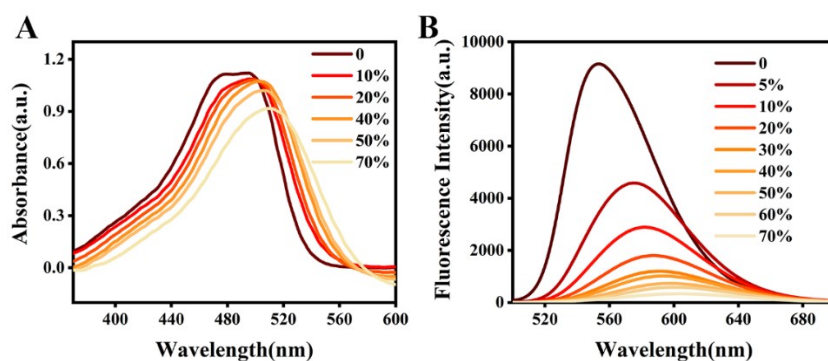

**Fig. S13.** (A) Absorption spectra and (B) FL spectra of CN (15  $\mu\text{M}$ ) in a THF/water mixed solution with different water fractions ( $\lambda_{\text{ex}} = 480 \text{ nm}$ ).

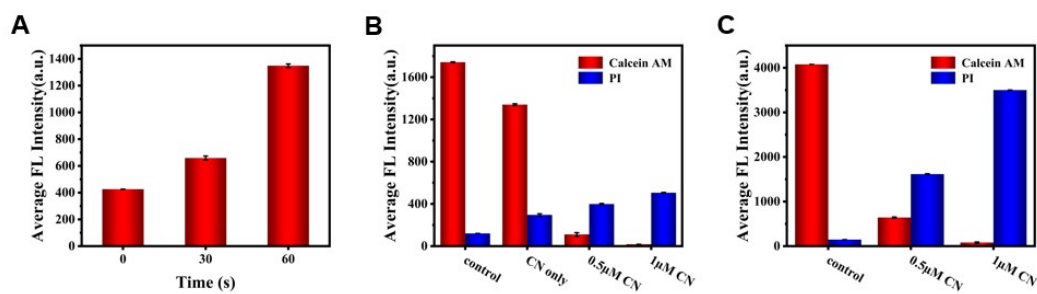

**Fig. S14.** (A) Fluorescence intensity of HeLa cells after being incubated with CN (1  $\mu\text{M}$ ) and loaded with DCFH-DA (10  $\mu\text{M}$ ) under laser irradiation (532 nm, 20  $\text{mW cm}^{-2}$ ); Fluorescence intensity of (B) HeLa cells and (C) MCSs with different treatments (L: laser irradiation with 532 nm, 0.1  $\text{W cm}^{-2}$ ).

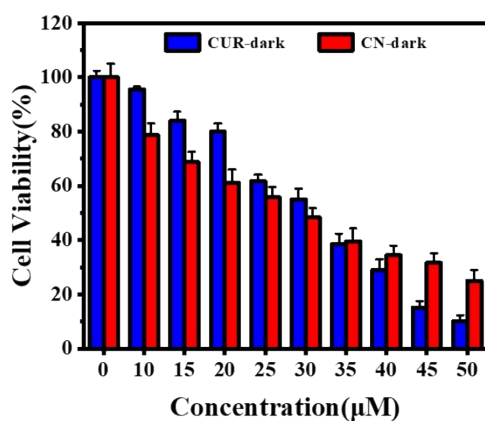

**Fig. S15.** Cell viability of HeLa cells after being incubated with different concentrations of CN and CUR after 72h.

**Table S2** The calculated IC50 of CUR and CCN for HeLa cells.

|     | 532 nm laser ( $\mu\text{M}$ ) | dark ( $\mu\text{M}$ ) |
|-----|--------------------------------|------------------------|
| CUR | /                              | 29.66                  |
| CN  | 0.45                           | 26.68                  |
